# Supplementary material
Source: PubMed Central journal article supplement (PMC3079565)

# QUORUM flowcharts

## CRP meta-analysis

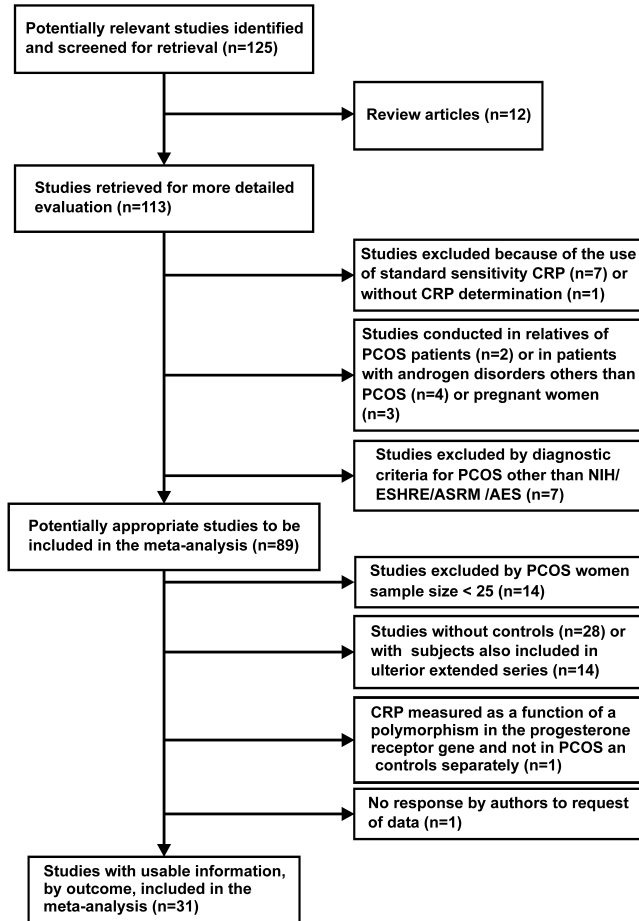

## IL-6 meta-analysis

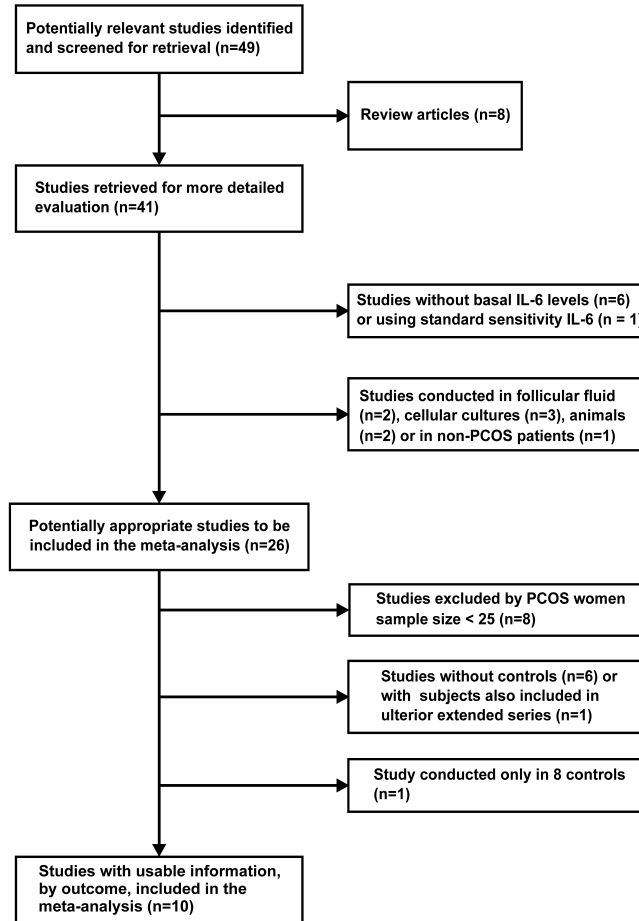

## TNF- $\alpha$ meta-analysis

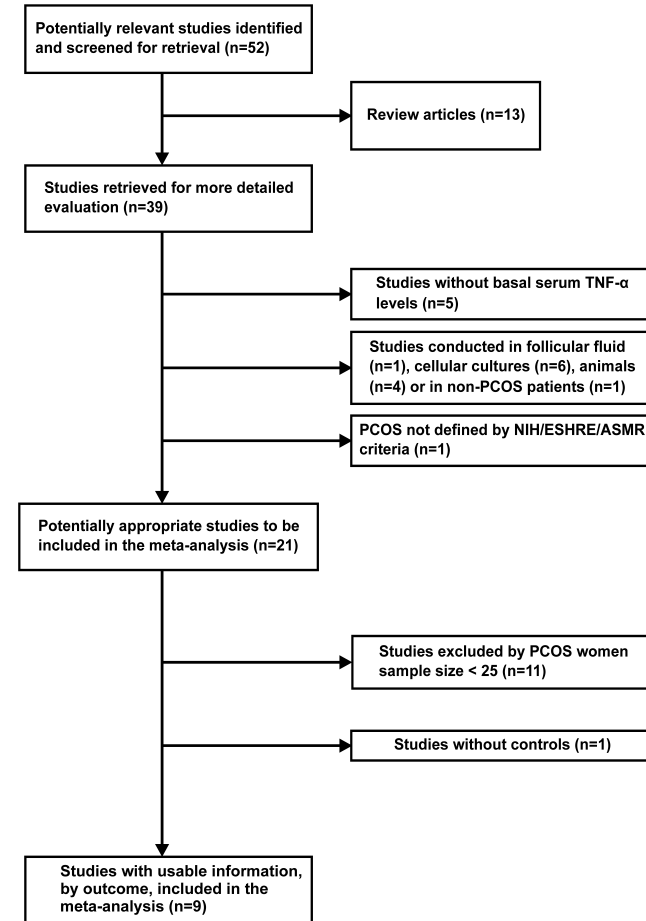

Supplement: NIHMS254674-supplement-1.pdf [file NIHMS254674-supplement-1.pdf]
